# Supplementary material for: Archetype-Based Modeling of Persona for Comprehensive Personality Computing from Personal Big Data
Source: MDPI journal article supplement (doi:10.3390/s18030684), 2018-02-25
Supplement: s1 [file s1]

Article

# Archetype-Based Modeling of Persona for Comprehensive Personality Computing from Personal Big Data

Ao Guo <sup>1,\*</sup> and Jianhua Ma <sup>2</sup>

<sup>1</sup> Graduate School of Computer and Information Sciences, Hosei University, Tokyo 184-8584, Japan;

<sup>2</sup> Faculty of Computer and Information Sciences, Hosei University, Tokyo 184-8584, Japan; jianhua@hosei.ac.jp

\* Correspondence: guo.ao.33@stu.hosei.ac.jp or guoakiral@gmail.com; Tel.: +81-70-1395-0028

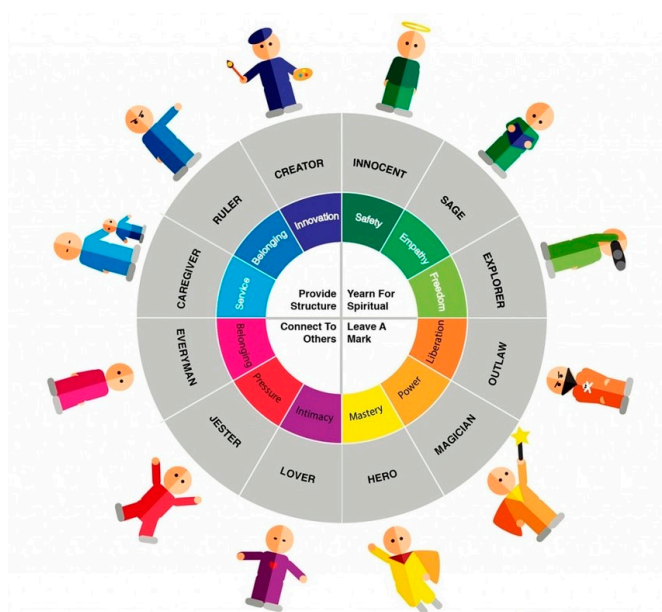

Figure S1: Jung's 12 Archetypes.

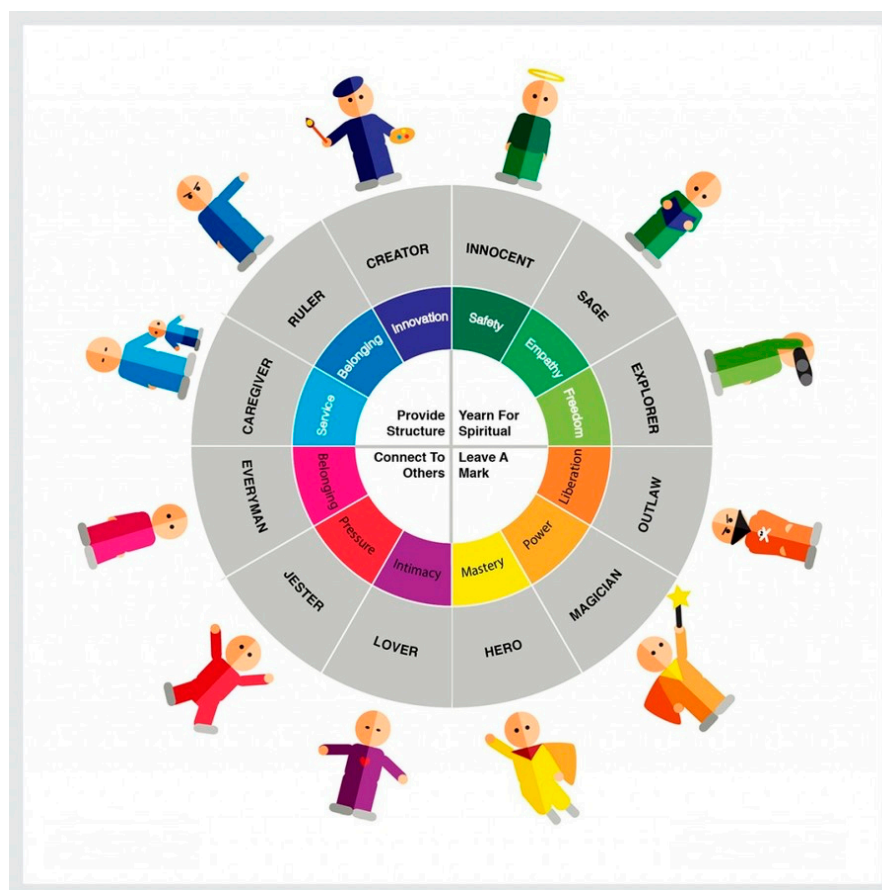

Figure S2: Description of the Hero Archetype.

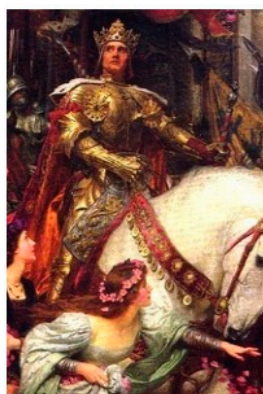

## 12. The Ruler

Motto: Power isn't everything, it's the only thing.

Core desire: control

Goal: create a prosperous, successful family or community

Strategy: exercise power

Greatest fear: chaos, being overthrown

Weakness: being authoritarian, unable to delegate

Talent: responsibility, leadership

The Ruler is also known as: The boss, leader, aristocrat, king, queen, politician, role model, manager or administrator.

Figure S3: Description of the Ruler Archetype.

**Table S1:** Heterogeneous Data Sources.

| Data Source       | Name                 | Unit                 | Time Unit |
|-------------------|----------------------|----------------------|-----------|
| Smartphone Sensor | GPS Data             | (Lng, Lat)           | s         |
| Smartphone Sensor | Angular Acceleration | (Ax, Ay, Az)         | s         |
| Smartphone APP    | Step Counter         | Step                 | m         |
| Smartphone Sensor | Barometer            | S                    | s         |
| Smartphone APP    | Energy Burn          | Calorie              | m         |
| Smartphone APP    | Step Distance        | Meter                | m         |
| Smartphone Sensor | Voice Record         | C                    | ms        |
| Smartphone Sensor | Image Record         | C                    | ms        |
| Smartphone Sensor | Acceleration         | (Gx, Gy, Gz)         | ms        |
| Smartphone Sensor | Temperature          | °C                   | s         |
| Smartphone Sensor | Light                | Lux                  | ms        |
| Smartphone Sensor | Humidity             | %                    | s         |
| Smartphone Sensor | Proximity            | cm                   | s         |
| GPS Tracker       | GPS Data             | (Lng, Lat)           | ms        |
| iWatch            | GPS Data             | (Lng, Lat)           | s         |
| Mindwave          | Mind Wave            | (Alpha, Beta, Gamma) | ms        |
| iWatch            | Heart Rate           | Count                | m         |
| Smart Shoes       | Step Counter         | Count                | ms        |
| Hitoe C3Fit       | Heart beat           | Rate                 | ms        |
| Spire             | Breathing Rate       | Count                | m         |
| Spire             | Emotion              | Rate                 | m         |
| Smart Ring        | Acceleration         | (Gx, Gy, Gz)         | ms        |
| Fitbit Charge 2   | Sleep Data           | Sleep Hour           | h         |
| Empatica E4       | EDA Data             | Emotion Response     | µs        |
| Empatica E4       | BVP Data             | Blood Volume Pulse   | ms        |
| Myo               | Gesture              | (Gx, Gy, Gz)         | s         |
| Myo               | Acceleration         | (Gx, Gy, Gz)         | ms        |
| Jins Meme         | Eye Focus            | (Gx, Gy, Gz)         | s         |
| Jins Meme         | Eye Tracker          | (X, Y)               | s         |
| Qardio Arm        | Blood Pressure       | (H, L)               | s         |
| Internet          | Web History          | Site                 | s         |
| Internet          | Facebook State       | Post                 | s         |
| Internet          | Wechat Message       | Message              | s         |
| Internet          | Wechat Moment        | Post                 | s         |
| Internet          | Shopping data        | Records              | s         |
| Internet          | Twitter State        | Post                 | s         |

**Table S2:** Archetype Definitions.

| Archetype               | Definition                                                                                                                                                                                                                                                            |
|-------------------------|-----------------------------------------------------------------------------------------------------------------------------------------------------------------------------------------------------------------------------------------------------------------------|
| Caregiver               | Represented by caring, compassion, and generosity. Commonly protective, devoted, sacrificing, nurturing, and often parental. Usually very benevolent, friendly, helping, and trusting                                                                                 |
| Creator                 | Represented by the innovative, the artistic, and the inventive. Often non-social; perhaps a dreamer; looking for novelty and beauty and an aesthetic standard. Will emphasize quality (over quantity), being highly internally driven                                 |
| Everyman/<br>Everywoman | Represented by the working-class common person; the underdog; the neighbor. Persevering, ordered, wholesome; usually candid and sometimes fatalistic. Often self-deprecating; perhaps cynical, careful, a realistic and often disappointed humanist                   |
| Explorer                | Represented by an independent, free-willed adventurer. Seeks discovery and fulfillment. Often solitary; spirited and indomitable; observer of the self and environment. Constantly moving; a wanderer                                                                 |
| Hero                    | Represented frequently by the courageous, impetuous warrior. Noble rescuer and crusader; must often undertake an arduous task to “prove their worth” and later become an inspiration. Symbolically the “dragonslayer”—the redeemer of human strength                  |
| Innocent                | Represented by the pure, faithful, naive, childlike character. Humble and tranquil; longing for happiness and simplicity—a paradise. Often a traditionalist; saintly; symbolizing renewal                                                                             |
| Jester                  | Represented by living for fun and amusement; a playful and mischievous comedian. Usually ironic and mirthful, sometimes irresponsible; a prankster. Enjoys most a good time and diversion from care                                                                   |
| Lover                   | Represented by the intimate, romantic, sensual, and especially passionate. Seeking mainly to find and give love and pleasure. Seductive and delightful, but perilous—often tempestuous and capricious. Often a warm, playful, erotic, and enthusiastic partner        |
| Magician                | Represented by the physicist; the visionary; the alchemist. Seeking the principles of development and how things work; a teacher, a performer or a scientist. Fundamentalist interested in natural forces, transformations, and metamorphoses                         |
| Outlaw                  | Represented in the rebellious iconoclast; the survivor and the misfit. Often vengeful, a disruptive rule-breaker, possibly stemming from hidden anger. Can be wild, destructive and provoking from a long time spent struggling or injured                            |
| Ruler                   | Represented by a strong sense of power and control: the leader; the boss; the judge. Highly influential, stubborn, even tyrannical. Maintains a high level of dominance; can apply to an administrator, arbiter, or a manager of others                               |
| Sage                    | Represented by a valuing of enlightenment and knowledge; truth and understanding. This is the expert and the counselor, possessing wisdom and acumen, perhaps a bit pretentious. Scholarly, philosophical, intelligent; a mystical and prestigious guide in the world |
| Shadow                  | Represented by the violent, haunted, and the primitive; the darker aspects of humanity. Often seen in a tragic figure, rejected; awkward, desperately emotional. Can be seen to lack morality; a savage nemesis                                                       |
